# Supplementary material
Source: publisher site journal article supplement (https://www.dovepress.com/get_supplementary_file.php?f=428067.docx)

**Supplementary Material List**

**Supplementary table 1** 184 ST23 *Kp*sequencing data information used in this study.

**Supplementary table 2** 184 ST23 *Kp* cinical data. Orange yellow annotates clonally transmitted clinical strain information, green annotates abscess information, and blue annotates sepsis information.

**Supplementary table 3-1** Comparison of clinical characteristics of MDR and non-MDR ST23 strains.

**Supplementary table 3-2** Clinical characteristics of 10 ST23 strains with poor prognosis.

**Supplementary table 4** Species complex,K locus, O_locus,Omp_mutations,CG23 sublineage of 184 ST23 *Kp* used in this study, highlighted in blue. The clinical information carried by *ICEKp1* with *ybt2* or *ICEKp3* with *ybt9* strain is displayed in green.

**Supplementary figure 1** *SNP* matrix plot of 184 ST23 *Klebsiella pneumoniae* isolates.

**Supplementary table 1** 184 ST23 *Kp*sequencing data information used in this study.

| **Project number** | **Strain** | **File Name** | **Accession number _interlinkage** | **Sample number** | **Assembly number** |
| --- | --- | --- | --- | --- | --- |
| CNP0001198 | KP2528 | 01-05.fasta.gz | <http://db.cngb.org/search/project/CNP0001198/> | CNS0259222 | CNA0017649 |
| CNP0001198 | KP2408 | 01-15.fasta.gz | <http://db.cngb.org/search/project/CNP0001198/> | CNS0258965 | CNA0017392 |
| CNP0001198 | KP1831 | 01-23.fasta.gz | <http://db.cngb.org/search/project/CNP0001198/> | CNS0258957 | CNA0017384 |
| CNP0001198 | KP2516 | 01-26.fasta.gz | <http://db.cngb.org/search/project/CNP0001198/> | CNS0258954 | CNA0017381 |
| CNP0001198 | KP2440 | 01-41.fasta.gz | <http://db.cngb.org/search/project/CNP0001198/> | CNS0258939 | CNA0017366 |
| CNP0001198 | KP2290 | 01-75.fasta.gz | <http://db.cngb.org/search/project/CNP0001198/> | CNS0258905 | CNA0017332 |
| CNP0001198 | KP2154 | 02-28.fasta.gz | <http://db.cngb.org/search/project/CNP0001198/> | CNS0258871 | CNA0017298 |
| CNP0001198 | KP2152 | 02-30.fasta.gz | <http://db.cngb.org/search/project/CNP0001198/> | CNS0258869 | CNA0017296 |
| CNP0001198 | KP1933 | 03-09.fasta.gz | <http://db.cngb.org/search/project/CNP0001198/> | CNS0258810 | CNA0017237 |
| CNP0001198 | KP1858 | 03-26.fasta.gz | <http://db.cngb.org/search/project/CNP0001198/> | CNS0258795 | CNA0017222 |
| CNP0001198 | KP2519 | 03-49.fasta.gz | <http://db.cngb.org/search/project/CNP0001198/> | CNS0258773 | CNA0017200 |
| CNP0001198 | KP2430 | 04-21.fasta.gz | <http://db.cngb.org/search/project/CNP0001198/> | CNS0258720 | CNA0017147 |
| CNP0001198 | KP2416 | 04-27.fasta.gz | <http://db.cngb.org/search/project/CNP0001198/> | CNS0258714 | CNA0017141 |
| CNP0001198 | KP2397 | 04-43.fasta.gz | <http://db.cngb.org/search/project/CNP0001198/> | CNS0258698 | CNA0017125 |
| CNP0001198 | KP2388 | 04-48.fasta.gz | <http://db.cngb.org/search/project/CNP0001198/> | CNS0258693 | CNA0017120 |
| CNP0001198 | KP2313 | 05-11.fasta.gz | <http://db.cngb.org/search/project/CNP0001198/> | CNS0258650 | CNA0017077 |
| CNP0001198 | KP2314 | 05-12.fasta.gz | <http://db.cngb.org/search/project/CNP0001198/> | CNS0258649 | CNA0017076 |
| CNP0001198 | KP2293 | 05-25.fasta.gz | <http://db.cngb.org/search/project/CNP0001198/> | CNS0258637 | CNA0017064 |
| CNP0001198 | KP2294 | 05-26.fasta.gz | <http://db.cngb.org/search/project/CNP0001198/> | CNS0258636 | CNA0017063 |
| CNP0001198 | KP2178 | 06-12.fasta.gz | <http://db.cngb.org/search/project/CNP0001198/> | CNS0258569 | CNA0016996 |
| CNP0001198 | KP2084 | 06-68.fasta.gz | <http://db.cngb.org/search/project/CNP0001198/> | CNS0258513 | CNA0016940 |
| CNP0001198 | KP2064 | 06-76.fasta.gz | <http://db.cngb.org/search/project/CNP0001198/> | CNS0258505 | CNA0016932 |
| CNP0001198 | KP2028 | 07-19.fasta.gz | <http://db.cngb.org/search/project/CNP0001198/> | CNS0258481 | CNA0016908 |
| CNP0001198 | KP2020 | 07-26.fasta.gz | <http://db.cngb.org/search/project/CNP0001198/> | CNS0258474 | CNA0016901 |
| CNP0001198 | KP1989 | 07-40.fasta.gz | <http://db.cngb.org/search/project/CNP0001198/> | CNS0258460 | CNA0016887 |
| CNP0001198 | KP1981 | 07-47.fasta.gz | <http://db.cngb.org/search/project/CNP0001198/> | CNS0258453 | CNA0016880 |
| CNP0001198 | KP1954 | 07-59.fasta.gz | <http://db.cngb.org/search/project/CNP0001198/> | CNS0258441 | CNA0016868 |
| CNP0001198 | KP1890 | 08-15.fasta.gz | <http://db.cngb.org/search/project/CNP0001198/> | CNS0258404 | CNA0016831 |
| CNP0001198 | KP1876 | 08-26.fasta.gz | <http://db.cngb.org/search/project/CNP0001198/> | CNS0258393 | CNA0016820 |
| CNP0001198 | KP1875 | 08-27.fasta.gz | <http://db.cngb.org/search/project/CNP0001198/> | CNS0258392 | CNA0016819 |
| CNP0001198 | KP1840 | 08-54.fasta.gz | <http://db.cngb.org/search/project/CNP0001198/> | CNS0258365 | CNA0016792 |
| CNP0001198 | KP1828 | 08-59.fasta.gz | <http://db.cngb.org/search/project/CNP0001198/> | CNS0258360 | CNA0016787 |
| CNP0001198 | KP1818 | 08-65.fasta.gz | <http://db.cngb.org/search/project/CNP0001198/> | CNS0258354 | CNA0016781 |
| CNP0001198 | KP1781 | 09-03.fasta.gz | <http://db.cngb.org/search/project/CNP0001198/> | CNS0258335 | CNA0016762 |
| CNP0001198 | KP2119 | 09-42.fasta.gz | <http://db.cngb.org/search/project/CNP0001198/> | CNS0258296 | CNA0016723 |
| CNP0001198 | KP1982 | 09-57.fasta.gz | <http://db.cngb.org/search/project/CNP0001198/> | CNS0258281 | CNA0016708 |
| CNP0001198 | KP2487 | 10-08.fasta.gz | <http://db.cngb.org/search/project/CNP0001198/> | CNS0258249 | CNA0016676 |
| CNP0001198 | KP2468 | 10-12.fasta.gz | <http://db.cngb.org/search/project/CNP0001198/> | CNS0258245 | CNA0016672 |
| CNP0001198 | KP2357 | 10-32.fasta.gz | <http://db.cngb.org/search/project/CNP0001198/> | CNS0258225 | CNA0016652 |
| CNP0001198 | KP2076 | 11-02.fasta.gz | <http://db.cngb.org/search/project/CNP0001198/> | CNS0258174 | CNA0016601 |
| CNP0001198 | KP1917 | 11-33.fasta.gz | <http://db.cngb.org/search/project/CNP0001198/> | CNS0258143 | CNA0016570 |
| CNP0001198 | KP1317 | 12-01.fasta.gz | <http://db.cngb.org/search/project/CNP0001198/> | CNS0257831 | CNA0016258 |
| CNP0001198 | KP1520 | 12-11.fasta.gz | <http://db.cngb.org/search/project/CNP0001198/> | CNS0257462 | CNA0015889 |
| CNP0001198 | KP1525 | 12-13.fasta.gz | <http://db.cngb.org/search/project/CNP0001198/> | CNS0257508 | CNA0015935 |
| CNP0001198 | KP1553 | 12-32.fasta.gz | <http://db.cngb.org/search/project/CNP0001198/> | CNS0258063 | CNA0016490 |
| CNP0001198 | KP1606 | 12-41.fasta.gz | <http://db.cngb.org/search/project/CNP0001198/> | CNS0257871 | CNA0016298 |
| CNP0001198 | KP1605 | 12-42.fasta.gz | <http://db.cngb.org/search/project/CNP0001198/> | CNS0257869 | CNA0016296 |
| CNP0001198 | KP1618 | 12-78.fasta.gz | <http://db.cngb.org/search/project/CNP0001198/> | CNS0258110 | CNA0016537 |
| CNP0001198 | KP1631 | 13-16.fasta.gz | <http://db.cngb.org/search/project/CNP0001198/> | CNS0257886 | CNA0016313 |
| CNP0001198 | KP1642 | 13-20.fasta.gz | <http://db.cngb.org/search/project/CNP0001198/> | CNS0257895 | CNA0016322 |
| CNP0001198 | KP1623 | 13-22.fasta.gz | <http://db.cngb.org/search/project/CNP0001198/> | CNS0257879 | CNA0016306 |
| CNP0001198 | KP1679 | 13-40.fasta.gz | <http://db.cngb.org/search/project/CNP0001198/> | CNS0257920 | CNA0016347 |
| CNP0001198 | KP1707 | 13-52.fasta.gz | <http://db.cngb.org/search/project/CNP0001198/> | CNS0257940 | CNA0016367 |
| CNP0001198 | KP1653 | 13-59.fasta.gz | <http://db.cngb.org/search/project/CNP0001198/> | CNS0257904 | CNA0016331 |
| CNP0001198 | KP1691 | 13-70.fasta.gz | <http://db.cngb.org/search/project/CNP0001198/> | CNS0257925 | CNA0016352 |
| CNP0001198 | KP1740 | 14-55.fasta.gz | <http://db.cngb.org/search/project/CNP0001198/> | CNS0257959 | CNA0016386 |
| CNP0001198 | KP1741 | 14-57.fasta.gz | <http://db.cngb.org/search/project/CNP0001198/> | CNS0257957 | CNA0016384 |
| CNP0001198 | KP1023 | 14-81.fasta.gz | <http://db.cngb.org/search/project/CNP0001198/> | CNS0257325 | CNA0015752 |
| CNP0001198 | KP1056 | 15-25.fasta.gz | <http://db.cngb.org/search/project/CNP0001198/> | CNS0257343 | CNA0015770 |
| CNP0001198 | KP1061 | 15-37.fasta.gz | <http://db.cngb.org/search/project/CNP0001198/> | CNS0257540 | CNA0015967 |
| CNP0001198 | KP1075 | 15-53.fasta.gz | <http://db.cngb.org/search/project/CNP0001198/> | CNS0257547 | CNA0015974 |
| CNP0001198 | KP1058 | 15-67.fasta.gz | <http://db.cngb.org/search/project/CNP0001198/> | CNS0257342 | CNA0015769 |
| CNP0001198 | KP1116 | 15-68.fasta.gz | <http://db.cngb.org/search/project/CNP0001198/> | CNS0257572 | CNA0015999 |
| CNP0001198 | KP1101 | 15-71.fasta.gz | <http://db.cngb.org/search/project/CNP0001198/> | CNS0257561 | CNA0015988 |
| CNP0001198 | KP1127 | 16-08.fasta.gz | <http://db.cngb.org/search/project/CNP0001198/> | CNS0257580 | CNA0016007 |
| CNP0001198 | KP1165 | 16-53.fasta.gz | <http://db.cngb.org/search/project/CNP0001198/> | CNS0257601 | CNA0016028 |
| CNP0001198 | KP1189 | 17-03.fasta.gz | <http://db.cngb.org/search/project/CNP0001198/> | CNS0257381 | CNA0015808 |
| CNP0001198 | KP1239 | 17-07.fasta.gz | <http://db.cngb.org/search/project/CNP0001198/> | CNS0257383 | CNA0015810 |
| CNP0001198 | KP1218 | 17-17.fasta.gz | <http://db.cngb.org/search/project/CNP0001198/> | CNS0257401 | CNA0015828 |
| CNP0001198 | KP1195 | 17-30.fasta.gz | <http://db.cngb.org/search/project/CNP0001198/> | CNS0257391 | CNA0015818 |
| CNP0001198 | KP1305 | 18-11.fasta.gz | <http://db.cngb.org/search/project/CNP0001198/> | CNS0257424 | CNA0015851 |
| CNP0001198 | KP1370 | 18-72.fasta.gz | <http://db.cngb.org/search/project/CNP0001198/> | CNS0257505 | CNA0015932 |
| CNP0001198 | KP1412 | 19-30.fasta.gz | <http://db.cngb.org/search/project/CNP0001198/> | CNS0257746 | CNA0016173 |
| CNP0001198 | KP1458 | 20-05.fasta.gz | <http://db.cngb.org/search/project/CNP0001198/> | CNS0258044 | CNA0016471 |
| CNP0001198 | KP1464 | 20-13.fasta.gz | <http://db.cngb.org/search/project/CNP0001198/> | CNS0257770 | CNA0016197 |
| CNP0001198 | KP0431 | 20-79.fasta.gz | <http://db.cngb.org/search/project/CNP0001198/> | CNS0256712 | CNA0015139 |
| CNP0001198 | KP0401 | 20-80.fasta.gz | <http://db.cngb.org/search/project/CNP0001198/> | CNS0256681 | CNA0015108 |
| CNP0001198 | KP0411 | 21-06.fasta.gz | <http://db.cngb.org/search/project/CNP0001198/> | CNS0256689 | CNA0015116 |
| CNP0001198 | KP0436 | 21-10-0.fasta.gz | <http://db.cngb.org/search/project/CNP0001198/> | CNS0256732 | CNA0015159 |
| CNP0001198 | KP0445 | 21-14.fasta.gz | <http://db.cngb.org/search/project/CNP0001198/> | CNS0256723 | CNA0015150 |
| CNP0001198 | KP0466 | 21-27.fasta.gz | <http://db.cngb.org/search/project/CNP0001198/> | CNS0256747 | CNA0015174 |
| CNP0001198 | KP0394 | 21-29.fasta.gz | <http://db.cngb.org/search/project/CNP0001198/> | CNS0256673 | CNA0015100 |
| CNP0001198 | KP0430 | 21-49.fasta.gz | <http://db.cngb.org/search/project/CNP0001198/> | CNS0256708 | CNA0015135 |
| CNP0001198 | KP0497 | 21-56.fasta.gz | <http://db.cngb.org/search/project/CNP0001198/> | CNS0256776 | CNA0015203 |
| CNP0001198 | KP0461 | 21-75.fasta.gz | <http://db.cngb.org/search/project/CNP0001198/> | CNS0256739 | CNA0015166 |
| CNP0001198 | KP0400 | 22-20.fasta.gz | <http://db.cngb.org/search/project/CNP0001198/> | CNS0256677 | CNA0015104 |
| CNP0001198 | KP0456 | 22-31.fasta.gz | <http://db.cngb.org/search/project/CNP0001198/> | CNS0256734 | CNA0015161 |
| CNP0001198 | KP0521 | 22-38.fasta.gz | <http://db.cngb.org/search/project/CNP0001198/> | CNS0256654 | CNA0015081 |
| CNP0001198 | KP0516 | 22-50.fasta.gz | <http://db.cngb.org/search/project/CNP0001198/> | CNS0256796 | CNA0015223 |
| CNP0001198 | KP0519 | 22-53.fasta.gz | <http://db.cngb.org/search/project/CNP0001198/> | CNS0256799 | CNA0015226 |
| CNP0001198 | KP0534 | 22-68.fasta.gz | <http://db.cngb.org/search/project/CNP0001198/> | CNS0256815 | CNA0015242 |
| CNP0001198 | KP0535 | 22-69.fasta.gz | <http://db.cngb.org/search/project/CNP0001198/> | CNS0256816 | CNA0015243 |
| CNP0001198 | KP0555 | 23-11.fasta.gz | <http://db.cngb.org/search/project/CNP0001198/> | CNS0256836 | CNA0015263 |
| CNP0001198 | KP0575 | 23-31.fasta.gz | <http://db.cngb.org/search/project/CNP0001198/> | CNS0256856 | CNA0015283 |
| CNP0001198 | KP0628 | 24-03.fasta.gz | <http://db.cngb.org/search/project/CNP0001198/> | CNS0256911 | CNA0015338 |
| CNP0001198 | KP0629 | 24-21.fasta.gz | <http://db.cngb.org/search/project/CNP0001198/> | CNS0256912 | CNA0015339 |
| CNP0001198 | KP0650 | 24-26.fasta.gz | <http://db.cngb.org/search/project/CNP0001198/> | CNS0256933 | CNA0015360 |
| CNP0001198 | KP0660 | 24-36.fasta.gz | <http://db.cngb.org/search/project/CNP0001198/> | CNS0256943 | CNA0015370 |
| CNP0001198 | KP0777 | 25-30.fasta.gz | <http://db.cngb.org/search/project/CNP0001198/> | CNS0257063 | CNA0015490 |
| CNP0001198 | KP0770 | 25-47.fasta.gz | <http://db.cngb.org/search/project/CNP0001198/> | CNS0257052 | CNA0015479 |
| CNP0001198 | KP0744 | 25-58.fasta.gz | <http://db.cngb.org/search/project/CNP0001198/> | CNS0257028 | CNA0015455 |
| CNP0001198 | KP0858 | 26-14.fasta.gz | <http://db.cngb.org/search/project/CNP0001198/> | CNS0257150 | CNA0015577 |
| CNP0001198 | KP0788 | 26-39.fasta.gz | <http://db.cngb.org/search/project/CNP0001198/> | CNS0257070 | CNA0015497 |
| CNP0001198 | KP0836 | 26-50.fasta.gz | <http://db.cngb.org/search/project/CNP0001198/> | CNS0257094 | CNA0015521 |
| CNP0001198 | KP0820 | 26-57.fasta.gz | <http://db.cngb.org/search/project/CNP0001198/> | CNS0257107 | CNA0015534 |
| CNP0001198 | KP0832 | 26-61.fasta.gz | <http://db.cngb.org/search/project/CNP0001198/> | CNS0257120 | CNA0015547 |
| CNP0001198 | KP0881 | 27-07.fasta.gz | <http://db.cngb.org/search/project/CNP0001198/> | CNS0257170 | CNA0015597 |
| CNP0001198 | KP0891 | 27-12.fasta.gz | <http://db.cngb.org/search/project/CNP0001198/> | CNS0257185 | CNA0015612 |
| CNP0001198 | KP0885 | 27-17.fasta.gz | <http://db.cngb.org/search/project/CNP0001198/> | CNS0257176 | CNA0015603 |
| CNP0001198 | KP0852 | 27-36.fasta.gz | <http://db.cngb.org/search/project/CNP0001198/> | CNS0257143 | CNA0015570 |
| CNP0001198 | KP0849 | 27-45.fasta.gz | <http://db.cngb.org/search/project/CNP0001198/> | CNS0257136 | CNA0015563 |
| CNP0001198 | KP0835 | 27-49.fasta.gz | <http://db.cngb.org/search/project/CNP0001198/> | CNS0257121 | CNA0015548 |
| CNP0001198 | KP0949 | 27-66.fasta.gz | <http://db.cngb.org/search/project/CNP0001198/> | CNS0257246 | CNA0015673 |
| CNP0001198 | KP0935 | 27-76.fasta.gz | <http://db.cngb.org/search/project/CNP0001198/> | CNS0257228 | CNA0015655 |
| CNP0001198 | KP0939 | 28-05.fasta.gz | <http://db.cngb.org/search/project/CNP0001198/> | CNS0257232 | CNA0015659 |
| CNP0001198 | KP0916 | 28-21.fasta.gz | <http://db.cngb.org/search/project/CNP0001198/> | CNS0257208 | CNA0015635 |
| CNP0001198 | KP0937 | 28-26.fasta.gz | <http://db.cngb.org/search/project/CNP0001198/> | CNS0257230 | CNA0015657 |
| CNP0001198 | KP0964 | 28-39.fasta.gz | <http://db.cngb.org/search/project/CNP0001198/> | CNS0257262 | CNA0015689 |
| CNP0001198 | KP0975 | 28-40.fasta.gz | <http://db.cngb.org/search/project/CNP0001198/> | CNS0257272 | CNA0015699 |
| CNP0001198 | KP0985 | 28-46-0.fasta.gz | <http://db.cngb.org/search/project/CNP0001198/> | CNS0257282 | CNA0015709 |
| CNP0001198 | KP0977 | 28-51.fasta.gz | <http://db.cngb.org/search/project/CNP0001198/> | CNS0257277 | CNA0015704 |
| CNP0001198 | KP0965 | 28-55-0.fasta.gz | <http://db.cngb.org/search/project/CNP0001198/> | CNS0257260 | CNA0015687 |
| CNP0001198 | KP1009 | 28-69.fasta.gz | <http://db.cngb.org/search/project/CNP0001198/> | CNS0257307 | CNA0015734 |
| CNP0001198 | KP1017 | 29-12.fasta.gz | <http://db.cngb.org/search/project/CNP0001198/> | CNS0257317 | CNA0015744 |
| CNP0001198 | KP1015 | 29-18.fasta.gz | <http://db.cngb.org/search/project/CNP0001198/> | CNS0257314 | CNA0015741 |
| CNP0001198 | KP0170 | 29-28-0.fasta.gz | <http://db.cngb.org/search/project/CNP0001198/> | CNS0256419 | CNA0014846 |
| CNP0001198 | KP0178 | 29-34.fasta.gz | <http://db.cngb.org/search/project/CNP0001198/> | CNS0256427 | CNA0014854 |
| CNP0001198 | KP0174 | 29-39.fasta.gz | <http://db.cngb.org/search/project/CNP0001198/> | CNS0256416 | CNA0014843 |
| CNP0001198 | KP0215 | 29-50.fasta.gz | <http://db.cngb.org/search/project/CNP0001198/> | CNS0256464 | CNA0014891 |
| CNP0001198 | KP0196 | 29-54.fasta.gz | <http://db.cngb.org/search/project/CNP0001198/> | CNS0256443 | CNA0014870 |
| CNP0001198 | KP0199 | 29-59.fasta.gz | <http://db.cngb.org/search/project/CNP0001198/> | CNS0256447 | CNA0014874 |
| CNP0001198 | KP0193 | 29-66.fasta.gz | <http://db.cngb.org/search/project/CNP0001198/> | CNS0256439 | CNA0014866 |
| CNP0001198 | KP0216 | 29-73-0.fasta.gz | <http://db.cngb.org/search/project/CNP0001198/> | CNS0256462 | CNA0014889 |
| CNP0001198 | KP0205 | 29-76.fasta.gz | <http://db.cngb.org/search/project/CNP0001198/> | CNS0256451 | CNA0014878 |
| CNP0001198 | KP0209 | 30-1-0.fasta.gz | <http://db.cngb.org/search/project/CNP0001198/> | CNS0256457 | CNA0014884 |
| CNP0001198 | KP0227 | 30-20.fasta.gz | <http://db.cngb.org/search/project/CNP0001198/> | CNS0256475 | CNA0014902 |
| CNP0001198 | KP0262 | 30-48.fasta.gz | <http://db.cngb.org/search/project/CNP0001198/> | CNS0256513 | CNA0014940 |
| CNP0001198 | KP0263 | 30-51.fasta.gz | <http://db.cngb.org/search/project/CNP0001198/> | CNS0256515 | CNA0014942 |
| CNP0001198 | KP0252 | 30-56.fasta.gz | <http://db.cngb.org/search/project/CNP0001198/> | CNS0256501 | CNA0014928 |
| CNP0001198 | KP0256 | 30-61.fasta.gz | <http://db.cngb.org/search/project/CNP0001198/> | CNS0256507 | CNA0014934 |
| CNP0001198 | KP0280 | 30-75.fasta.gz | <http://db.cngb.org/search/project/CNP0001198/> | CNS0256529 | CNA0014956 |
| CNP0001198 | KP0349 | 31-39.fasta.gz | <http://db.cngb.org/search/project/CNP0001198/> | CNS0256595 | CNA0015022 |
| CNP0001198 | KP0380 | 31-46-0.fasta.gz | <http://db.cngb.org/search/project/CNP0001198/> | CNS0256624 | CNA0015051 |
| CNP0001198 | KP0339 | 31-51.fasta.gz | <http://db.cngb.org/search/project/CNP0001198/> | CNS0256586 | CNA0015013 |
| CNP0001198 | KP0325 | 31-68.fasta.gz | <http://db.cngb.org/search/project/CNP0001198/> | CNS0256570 | CNA0014997 |
| CNP0001198 | KP0323 | 31-70.fasta.gz | <http://db.cngb.org/search/project/CNP0001198/> | CNS0256565 | CNA0014992 |
| CNP0001198 | KP0331 | 32-03.fasta.gz | <http://db.cngb.org/search/project/CNP0001198/> | CNS0256575 | CNA0015002 |
| CNP0001198 | KP0335 | 32-11.fasta.gz | <http://db.cngb.org/search/project/CNP0001198/> | CNS0256579 | CNA0015006 |
| CNP0001198 | KP0314 | 32-14.fasta.gz | <http://db.cngb.org/search/project/CNP0001198/> | CNS0256558 | CNA0014985 |
| CNP0001198 | KP0159 | 32-23.fasta.gz | <http://db.cngb.org/search/project/CNP0001198/> | CNS0256404 | CNA0014831 |
| CNP0001198 | KP0027 | 32-43.fasta.gz | <http://db.cngb.org/search/project/CNP0001198/> | CNS0256254 | CNA0014681 |
| CNP0001198 | KP0019 | 32-44.fasta.gz | <http://db.cngb.org/search/project/CNP0001198/> | CNS0256249 | CNA0014676 |
| CNP0001198 | KP0141 | 33-02.fasta.gz | <http://db.cngb.org/search/project/CNP0001198/> | CNS0256378 | CNA0014805 |
| CNP0001198 | KP0004 | 33-08.fasta.gz | <http://db.cngb.org/search/project/CNP0001198/> | CNS0256391 | CNA0014818 |
| CNP0001198 | KP0014 | 33-20.fasta.gz | <http://db.cngb.org/search/project/CNP0001198/> | CNS0256242 | CNA0014669 |
| CNP0001198 | KP0020 | 33-39.fasta.gz | <http://db.cngb.org/search/project/CNP0001198/> | CNS0256250 | CNA0014677 |
| CNP0001198 | KP0050 | 33-45.fasta.gz | <http://db.cngb.org/search/project/CNP0001198/> | CNS0256279 | CNA0014706 |
| CNP0001198 | KP0045 | 33-46.fasta.gz | <http://db.cngb.org/search/project/CNP0001198/> | CNS0256275 | CNA0014702 |
| CNP0001198 | KP0067 | 33-54.fasta.gz | <http://db.cngb.org/search/project/CNP0001198/> | CNS0256296 | CNA0014723 |
| CNP0001198 | KP0055 | 33-56.fasta.gz | <http://db.cngb.org/search/project/CNP0001198/> | CNS0256283 | CNA0014710 |
| CNP0001198 | KP0086 | 34-04.fasta.gz | <http://db.cngb.org/search/project/CNP0001198/> | CNS0256316 | CNA0014743 |
| CNP0001198 | KP0084 | 34-07.fasta.gz | <http://db.cngb.org/search/project/CNP0001198/> | CNS0256315 | CNA0014742 |
| CNP0001198 | KP0102 | 34-10.fasta.gz | <http://db.cngb.org/search/project/CNP0001198/> | CNS0256396 | CNA0014823 |
| CNP0001198 | KP0037 | 34-25.fasta.gz | <http://db.cngb.org/search/project/CNP0001198/> | CNS0256267 | CNA0014694 |
| CNP0001198 | KP0039 | 34-26.fasta.gz | <http://db.cngb.org/search/project/CNP0001198/> | CNS0256268 | CNA0014695 |
| CNP0001198 | KP0121 | 34-38.fasta.gz | <http://db.cngb.org/search/project/CNP0001198/> | CNS0256355 | CNA0014782 |
| CNP0001198 | KP2541 | 34-41.fasta.gz | <http://db.cngb.org/search/project/CNP0001198/> | CNS0256345 | CNA0014772 |
| CNP0001198 | KP2550 | 34-48.fasta.gz | <http://db.cngb.org/search/project/CNP0001198/> | CNS0259074 | CNA0017501 |
| CNP0001198 | KP2570 | 34-51.fasta.gz | <http://db.cngb.org/search/project/CNP0001198/> | CNS0259082 | CNA0017509 |
| CNP0001198 | KP2572 | 34-55.fasta.gz | <http://db.cngb.org/search/project/CNP0001198/> | CNS0259279 | CNA0017706 |
| CNP0001198 | KP2616 | 34-75.fasta.gz | <http://db.cngb.org/search/project/CNP0001198/> | CNS0259090 | CNA0017517 |
| CNP0001198 | KP2628 | 34-76.fasta.gz | <http://db.cngb.org/search/project/CNP0001198/> | CNS0259093 | CNA0017520 |
| CNP0001198 | KP2671 | 36-21.fasta.gz | <http://db.cngb.org/search/project/CNP0001198/> | CNS0259007 | CNA0017434 |
| CNP0001198 | KP2685 | 36-32.fasta.gz | <http://db.cngb.org/search/project/CNP0001198/> | CNS0259152 | CNA0017579 |
| CNP0001198 | KP2689 | 36-40.fasta.gz | <http://db.cngb.org/search/project/CNP0001198/> | CNS0259012 | CNA0017439 |
| CNP0001198 | KP2702 | 36-57.fasta.gz | <http://db.cngb.org/search/project/CNP0001198/> | CNS0259063 | CNA0017490 |
| CNP0001198 | KP2728 | 37-10.fasta.gz | <http://db.cngb.org/search/project/CNP0001198/> | CNS0259260 | CNA0017687 |
| CNP0001198 | KP2739 | 37-14.fasta.gz | <http://db.cngb.org/search/project/CNP0001198/> | CNS0259261 | CNA0017688 |
| CNP0001198 | KP2757 | 37-34.fasta.gz | <http://db.cngb.org/search/project/CNP0001198/> | CNS0259283 | CNA0017710 |
| CNP0001198 | KP2771 | 37-47.fasta.gz | <http://db.cngb.org/search/project/CNP0001198/> | CNS0259191 | CNA0017618 |
| CNP0001198 | KP2783 | 37-59.fasta.gz | <http://db.cngb.org/search/project/CNP0001198/> | CNS0259197 | CNA0017624 |
| CNP0001198 | KP2798 | 37-72.fasta.gz | <http://db.cngb.org/search/project/CNP0001198/> | CNS0259207 | CNA0017634 |
| CNP0001198 | KP2824 | 38-18.fasta.gz | <http://db.cngb.org/search/project/CNP0001198/> | CNS0259215 | CNA0017642 |
| CNP0001198 | KP2827 | 38-23.fasta.gz | http://db.cngb.org/search/project/CNP0001198/ | CNS0259055 | CNA0017482 |

**Supplementary table 2** 184 ST23 Kp cinical data. Orange yellow annotates clonally transmitted clinical strain information, green annotates abscess information, and blue annotates sepsis information.

| **Bacterial number** | **Sample source** | **Location at time of culture** | **Infection source** | **Abscess** | **Sepsis** | **Clinical outcome** |
| --- | --- | --- | --- | --- | --- | --- |
| KP0159 | Respiratory secretion | surgical department | respiratory tract | _ | Y | Poor prognosis |
| KP0628 | Respiratory secretion | surgical department | respiratory tract | _ | N | Improvement |
| KP0858 | Blood | internal medicine | primary bacteraemia | _ | Y | Poor prognosis |
| KP0937 | Drainage & Puncture fluid | internal medicine | other | _ | N | Improvement |
| KP0965 | Urine | internal medicine | urinary tract | _ | N | Improvement |
| KP1015 | Drainage & Puncture fluid | surgical department | Abscess | liver | N | Improvement |
| KP1023 | Drainage & Puncture fluid | surgical department | Abscess | abdominal cavity | N | Improvement |
| KP1056 | Digestive system secretion | surgical department | other | _ | N | Improvement |
| KP1458 | Respiratory secretion | internal medicine | respiratory tract | _ | N | Improvement |
| KP1520 | Drainage & Puncture fluid | internal medicine | Abscess | pelvic cavity | N | Improvement |
| KP1525 | Blood | ICU | primary bacteraemia | _ | N | Improvement |
| KP2119 | Blood | ICU | primary bacteraemia | _ | Y | Poor prognosis |
| KP2440 | Wound secretion | surgical department | skin and soft tissue | _ | N | Improvement |
| KP2487 | Digestive system secretion | internal medicine | other | _ | N | Improvement |
| KP0039 | Drainage & Puncture fluid | internal medicine | Abscess | liver | N | Improvement |
| KP0086 | Drainage & Puncture fluid | internal medicine | Abscess | Neck / prostate | N | Improvement |
| KP0141 | Drainage & Puncture fluid | internal medicine | Abscess | liver | N | Improvement |
| KP0263 | Drainage & Puncture fluid | ICU | Abscess | liver | N | Improvement |
| KP0339 | Drainage & Puncture fluid | surgical department | Abscess | liver | N | Improvement |
| KP0394 | Abscess | internal medicine | Abscess | liver | N | Improvement |
| KP0400 | Drainage & Puncture fluid | surgical department | Abscess | liver | N | Improvement |
| KP0436 | Drainage & Puncture fluid | surgical department | Abscess | liver | N | Improvement |
| KP0516 | Wound secretion | internal medicine | skin and soft tissue | _ | N | Improvement |
| KP0885 | Drainage & Puncture fluid | surgical department | Abscess | abdominal cavity | N | Improvement |
| KP1195 | Abscess | surgical department | Abscess | liver | N | Improvement |
| KP1218 | Blood | Outpatient | primary bacteraemia | _ | N | Improvement |
| KP1239 | Blood | surgical department | primary bacteraemia | _ | N | Improvement |
| KP1305 | Drainage & Puncture fluid | emergency treatment | Abscess | Leg | N | Improvement |
| KP1464 | Urine | internal medicine | urinary tract | _ | N | Improvement |
| KP1618 | Abscess | surgical department | Abscess | Pharynx | N | Improvement |
| KP1831 | Abscess | surgical department | Abscess | liver | N | Improvement |
| KP2154 | Abscess | surgical department | Abscess | liver | N | Improvement |
| KP2290 | Abscess | surgical department | Abscess | liver | N | Improvement |
| KP2468 | Drainage & Puncture fluid | surgical department | skin and soft tissue | _ | N | Improvement |
| KP2516 | Abscess | internal medicine | Abscess | foot | N | Improvement |
| KP2616 | Drainage & Puncture fluid | surgical department | Abscess | liver | N | Improvement |
| KP2628 | Respiratory secretion | internal medicine | respiratory tract | _ | N | Improvement |
| KP2728 | Abscess | internal medicine | Abscess | liver | N | Improvement |
| KP2757 | Abscess | internal medicine | Abscess | liver | N | Improvement |
| KP0045 | Respiratory secretion | ICU | respiratory tract | _ | N | Improvement |
| KP0050 | Respiratory secretion | ICU | respiratory tract | _ | N | Improvement |
| KP0121 | Others | surgical department | skin and soft tissue | _ | N | Improvement |
| KP0174 | Respiratory secretion | emergency treatment | respiratory tract | _ | Y | Poor prognosis |
| KP0205 | Respiratory secretion | surgical department | respiratory tract | _ | N | Improvement |
| KP0323 | Respiratory secretion | emergency treatment | respiratory tract | _ | N | Improvement |
| KP0349 | Respiratory secretion | surgical department | respiratory tract | _ | N | Improvement |
| KP0461 | Digestive system secretion | surgical department | other | _ | N | Improvement |
| KP0660 | Respiratory secretion | ICU | respiratory tract | _ | N | Improvement |
| KP0788 | Respiratory secretion | ICU | respiratory tract | _ | N | Improvement |
| KP0836 | Respiratory secretion | ICU | respiratory tract | _ | N | Improvement |
| KP0849 | Respiratory secretion | internal medicine | respiratory tract | _ | N | Improvement |
| KP0939 | Respiratory secretion | ICU | respiratory tract | _ | N | Improvement |
| KP0985 | Respiratory secretion | ICU | respiratory tract | _ | N | Improvement |
| KP1061 | Respiratory secretion | ICU | respiratory tract | _ | N | Improvement |
| KP1691 | Respiratory secretion | internal medicine | respiratory tract | _ | N | Improvement |
| KP1741 | Respiratory secretion | internal medicine | respiratory tract | _ | N | Improvement |
| KP1933 | Blood | ICU | primary bacteraemia | _ | N | Improvement |
| KP0199 | Drainage & Puncture fluid | surgical department | Abscess | liver | N | Improvement |
| KP0280 | Blood | internal medicine | primary bacteraemia | _ | N | Improvement |
| KP0027 | Drainage & Puncture fluid | surgical department | Abscess | liver | N | Improvement |
| KP0055 | Drainage & Puncture fluid | surgical department | Abscess | liver | N | Improvement |
| KP0770 | Respiratory secretion | internal medicine | respiratory tract | _ | N | Improvement |
| KP0777 | Respiratory secretion | Outpatient | respiratory tract | _ | N | Improvement |
| KP0949 | Blood | internal medicine | primary bacteraemia | _ | N | Improvement |
| KP1917 | Digestive system secretion | surgical department | other | _ | N | Improvement |
| KP1982 | Blood | internal medicine | primary bacteraemia | _ | N | Improvement |
| KP2152 | Abscess | surgical department | Abscess | liver | N | Improvement |
| KP0004 | Blood | internal medicine | primary bacteraemia | _ | N | Improvement |
| KP0019 | Respiratory secretion | surgical department | respiratory tract | _ | N | Improvement |
| KP0020 | Respiratory secretion | internal medicine | respiratory tract | _ | N | Improvement |
| KP0067 | Respiratory secretion | internal medicine | respiratory tract | _ | N | Improvement |
| KP0102 | Blood | internal medicine | primary bacteraemia | _ | N | Improvement |
| KP0170 | Respiratory secretion | surgical department | respiratory tract | _ | N | Improvement |
| KP0193 | Blood | Outpatient | primary bacteraemia | _ | N | Improvement |
| KP0216 | Blood | surgical department | primary bacteraemia | _ | N | Improvement |
| KP0227 | Blood | internal medicine | primary bacteraemia | _ | N | Improvement |
| KP0252 | Blood | surgical department | primary bacteraemia | _ | N | Improvement |
| KP0325 | CSF | surgical department | other | _ | N | Poor prognosis |
| KP0430 | Respiratory secretion | internal medicine | respiratory tract | _ | N | Improvement |
| KP0650 | Others | internal medicine | skin and soft tissue | _ | N | Improvement |
| KP0832 | Respiratory secretion | internal medicine | respiratory tract | _ | N | Improvement |
| KP0852 | Respiratory secretion | internal medicine | respiratory tract | _ | N | Improvement |
| KP1017 | Wound secretion | internal medicine | skin and soft tissue | _ | N | Improvement |
| KP1642 | Respiratory secretion | Outpatient | respiratory tract | _ | N | Improvement |
| KP1653 | Respiratory secretion | Outpatient | respiratory tract | _ | N | Improvement |
| KP1679 | Respiratory secretion | surgical department | respiratory tract | _ | N | Improvement |
| KP1707 | Respiratory secretion | internal medicine | respiratory tract | _ | N | Improvement |
| KP1840 | Respiratory secretion | ICU | respiratory tract | _ | N | Improvement |
| KP1954 | Respiratory secretion | internal medicine | respiratory tract | _ | N | Improvement |
| KP1989 | Respiratory secretion | internal medicine | respiratory tract | _ | N | Improvement |
| KP2313 | Respiratory secretion | surgical department | respiratory tract | _ | N | Improvement |
| KP2550 | Abscess | surgical department | Abscess | abdominal cavity | N | Improvement |
| KP2572 | Respiratory secretion | internal medicine | respiratory tract | _ | N | Improvement |
| KP2689 | Blood | internal medicine | primary bacteraemia | _ | Y | Poor prognosis |
| KP2739 | Urine | internal medicine | urinary tract | _ | N | Improvement |
| KP2827 | Drainage & Puncture fluid | surgical department | Abscess | pelvic cavity | N | Improvement |
| KP0215 | Respiratory secretion | ICU | respiratory tract | _ | N | Improvement |
| KP0935 | Respiratory secretion | internal medicine | respiratory tract | _ | N | Improvement |
| KP0964 | Respiratory secretion | ICU | respiratory tract | _ | N | Improvement |
| KP0975 | Respiratory secretion | ICU | respiratory tract | _ | N | Improvement |
| KP0977 | Respiratory secretion | ICU | respiratory tract | _ | N | Improvement |
| KP1412 | Respiratory secretion | ICU | respiratory tract | _ | N | Improvement |
| KP1781 | Respiratory secretion | ICU | respiratory tract | _ | N | Improvement |
| KP0084 | Respiratory secretion | internal medicine | respiratory tract | _ | N | Improvement |
| KP0178 | Respiratory secretion | ICU | respiratory tract | _ | N | Improvement |
| KP0209 | Respiratory secretion | ICU | respiratory tract | _ | N | Improvement |
| KP0335 | Respiratory secretion | surgical department | respiratory tract | _ | N | Improvement |
| KP0445 | Respiratory secretion | ICU | respiratory tract | _ | N | Poor prognosis |
| KP0456 | Respiratory secretion | ICU | respiratory tract | _ | N | Improvement |
| KP0534 | Respiratory secretion | ICU | respiratory tract | _ | N | Improvement |
| KP0555 | Respiratory secretion | ICU | respiratory tract | _ | N | Improvement |
| KP0629 | Respiratory secretion | ICU | respiratory tract | _ | N | Improvement |
| KP0820 | Respiratory secretion | internal medicine | respiratory tract | _ | N | Improvement |
| KP0881 | Respiratory secretion | ICU | respiratory tract | _ | N | Improvement |
| KP0916 | Urine | internal medicine | urinary tract | _ | N | Improvement |
| KP1009 | Respiratory secretion | internal medicine | respiratory tract | _ | N | Improvement |
| KP1075 | Respiratory secretion | ICU | respiratory tract | _ | N | Improvement |
| KP1101 | Respiratory secretion | ICU | respiratory tract | _ | N | Improvement |
| KP1165 | Respiratory secretion | ICU | respiratory tract | _ | N | Improvement |
| KP1189 | Blood | Outpatient | primary bacteraemia | _ | N | Improvement |
| KP1631 | Respiratory secretion | internal medicine | respiratory tract | _ | N | Improvement |
| KP1818 | Respiratory secretion | internal medicine | respiratory tract | _ | N | Improvement |
| KP1875 | Respiratory secretion | emergency treatment | respiratory tract | _ | N | Improvement |
| KP1890 | Respiratory secretion | internal medicine | respiratory tract | _ | N | Improvement |
| KP2020 | Respiratory secretion | ICU | respiratory tract | _ | N | Improvement |
| KP2084 | Respiratory secretion | surgical department | respiratory tract | _ | N | Improvement |
| KP2178 | Respiratory secretion | internal medicine | respiratory tract | _ | N | Improvement |
| KP2294 | Respiratory secretion | internal medicine | respiratory tract | _ | N | Improvement |
| KP2314 | Respiratory secretion | ICU | respiratory tract | _ | N | Improvement |
| KP2408 | Abscess | surgical department | Abscess | liver | N | Improvement |
| KP2519 | Respiratory secretion | ICU | respiratory tract | _ | N | Improvement |
| KP2528 | Abscess | ICU | Abscess | liver | N | Improvement |
| KP2541 | Respiratory secretion | Outpatient | respiratory tract | _ | N | Improvement |
| KP2570 | Respiratory secretion | internal medicine | respiratory tract | _ | N | Improvement |
| KP2685 | Respiratory secretion | internal medicine | respiratory tract | _ | N | Improvement |
| KP2771 | Respiratory secretion | internal medicine | respiratory tract | _ | N | Improvement |
| KP2783 | Respiratory secretion | internal medicine | respiratory tract | _ | N | Improvement |
| KP2798 | Respiratory secretion | ICU | respiratory tract | _ | N | Improvement |
| KP0037 | Respiratory secretion | ICU | respiratory tract | _ | N | Improvement |
| KP0256 | Respiratory secretion | Outpatient | skin and soft tissue | _ | N | Improvement |
| KP0401 | Respiratory secretion | internal medicine | respiratory tract | _ | N | Improvement |
| KP0411 | Respiratory secretion | internal medicine | respiratory tract | _ | N | Improvement |
| KP0431 | Respiratory secretion | internal medicine | respiratory tract | _ | N | Improvement |
| KP0466 | Blood | ICU | primary bacteraemia | _ | N | Poor prognosis |
| KP0497 | Drainage & Puncture fluid | surgical department | Abscess | liver | N | Improvement |
| KP0519 | Respiratory secretion | internal medicine | respiratory tract | _ | Y | Improvement |
| KP0535 | Respiratory secretion | internal medicine | respiratory tract | _ | N | Improvement |
| KP0575 | Drainage & Puncture fluid | surgical department | Abscess | liver | N | Improvement |
| KP0835 | Respiratory secretion | Outpatient | respiratory tract | _ | N | Improvement |
| KP1116 | Respiratory secretion | internal medicine | respiratory tract | _ | N | Improvement |
| KP1127 | Respiratory secretion | Outpatient | respiratory tract | _ | N | Improvement |
| KP1317 | Respiratory secretion | internal medicine | respiratory tract | _ | N | Improvement |
| KP1605 | Respiratory secretion | internal medicine | respiratory tract | _ | N | Improvement |
| KP1606 | Respiratory secretion | surgical department | respiratory tract | _ | N | Improvement |
| KP1740 | Respiratory secretion | Outpatient | respiratory tract | _ | N | Improvement |
| KP1828 | Respiratory secretion | Outpatient | respiratory tract | _ | N | Improvement |
| KP1876 | Respiratory secretion | internal medicine | respiratory tract | _ | N | Improvement |
| KP2028 | Respiratory secretion | ICU | respiratory tract | _ | N | Improvement |
| KP2064 | Respiratory secretion | internal medicine | respiratory tract | _ | N | Improvement |
| KP2293 | Respiratory secretion | Outpatient | respiratory tract | _ | N | Improvement |
| KP2388 | Respiratory secretion | ICU | respiratory tract | _ | Y | Poor prognosis |
| KP2416 | Respiratory secretion | Outpatient | respiratory tract | _ | N | Improvement |
| KP2430 | Respiratory secretion | emergency treatment | respiratory tract | _ | N | Improvement |
| KP2671 | Blood | internal medicine | primary bacteraemia | _ | Y | Improvement |
| KP2702 | Blood | ICU | primary bacteraemia | _ | Y | Improvement |
| KP2824 | Respiratory secretion | internal medicine | respiratory tract | _ | N | Improvement |
| KP0014 | Respiratory secretion | internal medicine | respiratory tract | _ | N | Improvement |
| KP0262 | Urine | surgical department | urinary tract | _ | N | Improvement |
| KP0314 | Respiratory secretion | surgical department | respiratory tract | _ | N | Improvement |
| KP0331 | Respiratory secretion | internal medicine | respiratory tract | _ | N | Improvement |
| KP0891 | Wound secretion | internal medicine | skin and soft tissue | _ | N | Improvement |
| KP1858 | Urine | internal medicine | urinary tract | _ | N | Improvement |
| KP1981 | Respiratory secretion | surgical department | respiratory tract | _ | N | Improvement |
| KP0380 | Respiratory secretion | internal medicine | respiratory tract | _ | N | Improvement |
| KP0744 | Respiratory secretion | internal medicine | respiratory tract | _ | N | Improvement |
| KP1370 | Blood | internal medicine | primary bacteraemia | _ | Y | Poor prognosis |
| KP2397 | Respiratory secretion | internal medicine | respiratory tract | _ | N | Improvement |
| KP0196 | Blood | Outpatient | primary bacteraemia | _ | Y | Improvement |
| KP0521 | Drainage & Puncture fluid | internal medicine | Abscess | cerebral | N | Improvement |
| KP1058 | Abscess | surgical department | Abscess | liver | N | Improvement |
| KP1553 | Drainage & Puncture fluid | internal medicine | Abscess | liver | N | Improvement |
| KP1623 | Respiratory secretion | internal medicine | respiratory tract | _ | N | Improvement |
| KP2076 | Drainage & Puncture fluid | internal medicine | Abscess | liver | Y | Improvement |
| KP2357 | Digestive system secretion | internal medicine | other | _ | N | Improvement |

Y:yes N:no

**Supplementary table 3-1:** Comparison of clinical characteristics of MDR and non-MDR ST23 KP strains.

| **Characteristics** | **MDR** | **Non -MDR** | **Total** | **P Value** |
| --- | --- | --- | --- | --- |
| **(N=14)** | **(N=170)** | **(N=184)** |
| **Sex** |  |  |  | 0.44 |
| Male | 12 (85.71%) | 123 (72.35%) | 135 (73.4%) |  |
| Famale | 2 (14.29%) | 47 (27.65%) | 49 (26.6%) |  |
| **Age** | 61.29±14.34 | 54.90±15.82 | 55.39±15.77 | 0.15 |
| **Acquired infection** | |  |  | 1.00 |
| CAI | 9 (64.29%) | 111 (65.29%) | 120(65.22%) |  |
| HAI | 5 (35.71%) | 59 (34.71%) | 64(34.78%) |  |
| **Location at time of culture** | |  |  | 0.30 |
| Internal medicine | 3 (21.43%) | 75 (44.12%) | 78(42.39%) | 0.10 |
| surgical department | 6 (42.86%) | 40 (23.53%) | 46(25.00%) | 0.20 |
| ICU | 3 (21.43%) | 37 (21.76%) | 40(21.74%) | 0.76 |
| Outpatient and emergency | 2 (14.29%) | 18 (10.59%) | 20(10.87%) | 0.98 |
| **Infection source** |  |  |  |  |
| Primary bacteraemia | 0 (0.00%) | 20 (11.76%) | 20(10.87%) | 0.36 |
| Respiratory tract | 7 (50.00%) | 101 (59.41%) | 108(58.70%) | 0.49 |
| Abscess | 4 (28.57%) | 32 (18.82%) | 36(19.57%) | 0.59 |
| Urinary tract | 0 (0.00%) | 6 (3.53%) | 6(3.26%) | 0.93 |
| Skin and soft tissue | 0 (0.00%) | 6 (3.53%) | 6(3.26%) | 0.93 |
| Other source | 3 (21.43%) | 5 (2.94%) | 8(3.26%) | 0.01 |
| **Comorbidity** |  |  |  |  |
| Surgery within 2 weeks | 3 (21.43%) | 11 (6.47%) | 14(7.61%) | 0.13 |
| Diabetes mellitus | 3 (21.43%) | 22 (12.94%) | 25(13.59%) | 0.63 |
| Trauma | 2 (14.29%) | 16 (9.41%) | 18(9.78%) | 0.90 |
| Malignant tumour | 1 (7.14%) | 28 (16.47%) | 29(15.96%) | 0.59 |
| Cerebral vascular disease | 2 (14.29%) | 33 (19.41%) | 35(19.02%) | 0.91 |
| Pulmonary disease | 1 (7.14%) | 27 (15.88%) | 28(15.22%) | 0.63 |
| Other diseases | 0(0.00%) | 7(4.12%) | 7(3.80%) | 0.85 |
| Hypertension | 0(0.00%) | 2(1.18%) | 2(1.09%) | 0.58 |
| Chronic liver disease | 2(14.29%) | 6(3.53%) | 8(4.35%) | 0.06 |
| Coronary heart disease | 0(0.00%) | 7(4.12%) | 7(3.80%) | 0.85 |
| Immunosuppressive diseases | 0(0.00%) | 4(2.35%) | 4(2.18%) | 0.87 |
| No underlying disease | 0(0.00%) | 7(4.12%) | 7(3.80%) | 0.85 |
| **Sepsis or septic shock** | 1 (7.14%) | 11 (6.47%) | 12 (6.52%) | 1.00 |
| **Clinical outcomes** |  |  |  | 1.00 |
| Improvement | 13 (92.86%) | 161 (94.71%) | 174(94.57%) |  |
| Poor prognosis | 1 (7.14%) | 9 (5.29%) | 10(5.43%) |  |

P<0.05 was considered to be statistically significant.

**Supplementary table 3-2:** Clinical characteristics of 10 ST23 strains with poor prognosis.

| **MDR** | **Strains** | **Sample source** | **Age** | **Gender** | **Year** | **CAI** | **Location at time of culture** | **clinical diagnosis** | **Sepsis** | **Fever** | **WBC** | **N%** | **PCT** |
| --- | --- | --- | --- | --- | --- | --- | --- | --- | --- | --- | --- | --- | --- |
| Y | KP0159 | Respiratory secretion | 87 | M | 2014 | Y | emergency department | Postoperative hydrocephalus;pulmonary infection | Y | Y | 23 | 89.9 | 1.07 |
| N | KP0174 | Respiratory secretion | 42 | M | 2014 | Y | emergency department | tetanus | Y | Y | 14.8 | 88.7 | 0.66 |
| N | KP0325 | CSF | 41 | M | 2014 | N | surgical ward | Cerebrospinal fluid leakage; After chordoma surgery | N | Y | 21.8 | 89.9 | NT |
| N | KP0445 | Respiratory secretion | 53 | M | 2015 | Y | ICU | cerebral infarction | N | Y | 10.2 | 79.1 | NT |
| N | KP0466 | Blood | 69 | M | 2015 | N | ICU | Constrictive pericarditis | N | Y | 16.6 | 98.1 | NT |
| N | KP0858 | Blood | 71 | M | 2015 | Y | medical ward | Diabetes | Y | Y | 24.1 | 93.9 | 50.2 |
| N | KP1370 | Blood | 31 | F | 2016 | Y | medical ward | Systemic lupus erythematosus; Lupus nephritis | Y | Y | 4.2 | 83.8 | 27.17 |
| N | KP2119 | Blood | 62 | M | 2017 | N | ICU | Valvular heart disease | Y | Y | 17.4 | 93.2 | 120.7 |
| N | KP2388 | Respiratory secretion | 57 | M | 2017 | Y | ICU | Severe pneumonia | Y | N | 9.9 | 86.5 | 35.67 |
| N | KP2689 | Blood | 55 | F | 2018 | Y | medical ward | Acute non lymphocytic leukemia type M3 (high possibility) | Y | Y | 3 | 92 | 1.09 |

**Supplementary table 4** Species complex,K locus,O_locus,Omp_mutations,CG23 sublineage of 184 ST23 Kp used in this study, highlighted in blue. The clinical information carried by ICEKp1 with ybt2 or ICEKp3 with ybt9 strain is displayed in green.

| **Strain** | **Sample source** | **Species complex** | **Clonal group** | **K locus** | **O_locus** | **Omp_mutations** | **Sublineage CG23-I** | **Yersiniabactin** |
| --- | --- | --- | --- | --- | --- | --- | --- | --- |
| KP2528 | Abscess | KpI | CG23 | KL1 | O1/O2v2 | - | no | ybt 9; ICEKp3 |
| KP2408 | Abscess | KpI | CG23 | KL1 | O1/O2v2 | - | yes | ybt 1; ICEKp10 |
| KP1831 | Abscess | KpI | CG23 | KL1 | O1/O2v2 | - | yes | ybt 1; ICEKp10 |
| KP2516 | Abscess | KpI | CG23 | KL1 | O1/O2v2 | - | yes | ybt 1; ICEKp10 |
| KP2440 | Wound secretion | KpI | CG23 | KL1 | O1/O2v2 | - | yes | ybt 1; ICEKp10 |
| KP2290 | Abscess | KpI | CG23 | KL1 | O1/O2v2 | - | yes | ybt 1; ICEKp10 |
| KP2154 | Abscess | KpI | CG23 | KL1 | O1/O2v2 | - | yes | ybt 1; ICEKp10 |
| KP2152 | Abscess | KpI | CG23 | KL1 | O1/O2v2 | - | yes | ybt 1; ICEKp10 |
| KP1933 | Blood | KpI | CG23 | KL1 | O1/O2v2 | - | yes | ybt 1; ICEKp10 |
| KP1858 | Urine | KpI | CG23 | KL1 | O1/O2v2 | - | yes | ybt 1; ICEKp10 |
| KP2519 | Respiratory secretion | KpI | CG23 | KL1 | O1/O2v2 | - | yes | ybt 1; ICEKp10 |
| KP2430 | Respiratory secretion | KpI | CG23 | KL1 | O1/O2v2 | - | yes | ybt 1; ICEKp10 |
| KP2416 | Respiratory secretion | KpI | CG23 | KL1 | O1/O2v2 | - | yes | ybt 1; ICEKp10 |
| KP2397 | Respiratory secretion | KpI | CG23 | KL1 | O1/O2v2 | - | yes | ybt 1; ICEKp10 |
| KP2388 | Respiratory secretion | KpI | CG23 | KL1 | O1/O2v2 | - | yes | ybt 1; ICEKp10 |
| KP2313 | Respiratory secretion | KpI | CG23 | KL1 | O1/O2v2 | - | yes | ybt 1; ICEKp10 |
| KP2314 | Respiratory secretion | KpI | CG23 | KL1 | O1/O2v2 | - | yes | ybt 1; ICEKp10 (truncated) |
| KP2293 | Respiratory secretion | KpI | CG23 | KL1 | O1/O2v2 | - | yes | ybt 1; ICEKp10 (truncated) |
| KP2294 | Respiratory secretion | KpI | CG23 | KL1 | O1/O2v2 | - | yes | ybt 1; ICEKp10 (truncated) |
| KP2178 | Respiratory secretion | KpI | CG23 | KL1 | O1/O2v2 | - | yes | ybt 1; ICEKp10 |
| KP2084 | Respiratory secretion | KpI | CG23 | KL1 | O1/O2v2 | - | yes | ybt 1; ICEKp10 |
| KP2064 | Respiratory secretion | KpI | CG23 | KL1 | O1/O2v2 | - | no | ybt 2; ICEKp1 |
| KP2028 | Respiratory secretion | KpI | CG23 | KL1 | O1/O2v2 | - | yes | ybt 1; ICEKp10 |
| KP2020 | Respiratory secretion | KpI | CG23 | KL1 | O1/O2v2 | - | yes | ybt 1; ICEKp10 |
| KP1989 | Respiratory secretion | KpI | CG23 | KL1 | O1/O2v2 | - | yes | ybt 1; ICEKp10 |
| KP1981 | Respiratory secretion | KpI | CG23 | KL1 | O1/O2v2 | - | yes | ybt 1; ICEKp10 |
| KP1954 | Respiratory secretion | KpI | CG23 | KL1 | O1/O2v2 | - | yes | ybt 1; ICEKp10 |
| KP1890 | Respiratory secretion | KpI | CG23 | KL1 | O1/O2v2 | - | yes | ybt 1; ICEKp10 |
| KP1876 | Respiratory secretion | KpI | CG23 | KL1 | O1/O2v2 | - | yes | ybt 1; ICEKp10 |
| KP1875 | Respiratory secretion | KpI | CG23 | KL1 | O1/O2v2 | - | yes | ybt 1; ICEKp10 |
| KP1840 | Respiratory secretion | KpI | CG23 | KL1 | O1/O2v2 | - | yes | ybt 1; ICEKp10 |
| KP1828 | Respiratory secretion | KpI | CG23 | KL1 | O1/O2v2 | - | yes | ybt 1; ICEKp10 |
| KP1818 | Respiratory secretion | KpI | CG23 | KL1 | O1/O2v2 | - | yes | ybt 1; ICEKp10 |
| KP1781 | Respiratory secretion | KpI | CG23 | KL1 | O1/O2v2 | - | yes | ybt 1; ICEKp10 |
| KP2119 | Blood | KpI | CG23 | KL1 | O1/O2v2 | - | yes | ybt 1; ICEKp10 |
| KP1982 | Blood | KpI | CG23 | KL1 | O1/O2v2 | - | yes | ybt 1; ICEKp10 |
| KP2487 | Digestive system secretion | KpI | CG23 | KL1 | O1/O2v2 | - | yes | ybt 1; ICEKp10 |
| KP2468 | Drainage & Puncture fluid | KpI | CG23 | KL1 | O1/O2v2 | - | yes | ybt 1; ICEKp10 |
| KP2357 | Digestive system secretion | KpI | CG23 | KL1 | O1/O2v2 | - | yes | ybt 1; ICEKp10 (truncated) |
| KP2076 | Drainage & Puncture fluid | KpI | CG23 | KL1 | O1/O2v2 | - | yes | ybt 1; ICEKp10 (truncated) |
| KP1917 | Digestive system secretion | KpI | CG23 | KL1 | O1/O2v2 | - | yes | ybt 1; ICEKp10 |
| KP1317 | Respiratory secretion | KpI | CG23 | KL1 | O1/O2v2 | - | yes | ybt 1; ICEKp10 (truncated) |
| KP1520 | Drainage & Puncture fluid | KpI | CG23 | KL1 | O1/O2v2 | - | yes | ybt 1; ICEKp10 |
| KP1525 | Blood | KpI | CG23 | KL1 | O1/O2v2 | - | yes | ybt 1; ICEKp10 |
| KP1553 | Drainage & Puncture fluid | KpI | CG23 | KL1 | O1/O2v2 | - | yes | ybt 1; ICEKp10 |
| KP1606 | Respiratory secretion | KpI | CG23 | KL1 | O1/O2v2 | - | yes | ybt 1; ICEKp10 (truncated) |
| KP1605 | Respiratory secretion | KpI | CG23 | KL1 | O1/O2v2 | - | yes | ybt 1; ICEKp10 |
| KP1618 | Abscess | KpI | CG23 | KL1 | O1/O2v2 | - | yes | ybt 1; ICEKp10 |
| KP1631 | Respiratory secretion | KpI | CG23 | KL1 | O1/O2v2 | - | yes | ybt 1; ICEKp10 |
| KP1642 | Respiratory secretion | KpI | CG23 | KL1 | O1/O2v2 | - | yes | ybt 1; ICEKp10 |
| KP1623 | Respiratory secretion | KpI | CG23 | KL1 | O1/O2v2 | - | yes | ybt 1; ICEKp10 |
| KP1679 | Respiratory secretion | KpI | CG23 | KL1 | O1/O2v2 | - | yes | ybt 1; ICEKp10 |
| KP1707 | Respiratory secretion | KpI | CG23 | KL1 | O1/O2v2 | - | yes | ybt 1; ICEKp10 |
| KP1653 | Respiratory secretion | KpI | CG23 | KL1 | O1/O2v2 | - | yes | ybt 1; ICEKp10 |
| KP1691 | Respiratory secretion | KpI | CG23 | KL1 | O1/O2v2 | - | yes | ybt 1; ICEKp10 |
| KP1740 | Respiratory secretion | KpI | CG23 | KL1 | O1/O2v2 | - | yes | ybt 1; ICEKp10 |
| KP1741 | Respiratory secretion | KpI | CG23 | KL1 | O1/O2v2 | - | yes | ybt 1; ICEKp10 |
| KP1023 | Drainage & Puncture fluid | KpI | CG23 | KL1 | O1/O2v2 | - | yes | ybt 1; ICEKp10 |
| KP1056 | Digestive system secretion | KpI | CG23 | KL1 | O1/O2v2 | - | yes | ybt 1; ICEKp10 |
| KP1061 | Respiratory secretion | KpI | CG23 | KL1 | O1/O2v2 | - | yes | ybt 1; ICEKp10 |
| KP1075 | Respiratory secretion | KpI | CG23 | KL1 | O1/O2v2 | - | yes | ybt 1; ICEKp10 |
| KP1058 | Abscess | KpI | CG23 | KL1 | O1/O2v2 | - | yes | ybt 1; ICEKp10 |
| KP1116 | Respiratory secretion | KpI | CG23 | KL1 | O1/O2v2 | - | yes | ybt 1; ICEKp10 |
| KP1101 | Respiratory secretion | KpI | CG23 | KL1 | O1/O2v2 | - | yes | ybt 1; ICEKp10 |
| KP1127 | Respiratory secretion | KpI | CG23 | KL1 | O1/O2v2 | - | yes | ybt 1; ICEKp10 |
| KP1165 | Respiratory secretion | KpI | CG23 | KL1 | O1/O2v2 | - | yes | ybt 1; ICEKp10 |
| KP1189 | Blood | KpI | CG23 | KL1 | O1/O2v2 | - | yes | ybt 1; ICEKp10 |
| KP1239 | Blood | KpI | CG23 | KL1 | O1/O2v2 | - | yes | ybt 1; ICEKp10 (truncated) |
| KP1218 | Blood | KpI | CG23 | KL1 | O1/O2v2 | - | yes | ybt 1; ICEKp10 |
| KP1195 | Abscess | KpI | CG23 | KL1 | O1/O2v2 | - | yes | ybt 1; ICEKp10 |
| KP1305 | Drainage & Puncture fluid | KpI | CG23 | KL1 | O1/O2v2 | - | yes | ybt 1; ICEKp10 |
| KP1370 | Blood | KpI | CG23 | KL1 | O1/O2v2 | - | yes | ybt 1; ICEKp10 |
| KP1412 | Respiratory secretion | KpI | CG23 | KL1 | O1/O2v2 | - | yes | ybt 1; ICEKp10 |
| KP1458 | Respiratory secretion | KpI | CG23 | KL1 | O1/O2v2 | - | yes | ybt 1; ICEKp10 |
| KP1464 | Urine | KpI | CG23 | KL1 | O1/O2v2 | - | yes | ybt 1; ICEKp10 |
| KP0431 | Respiratory secretion | KpI | CG23 | KL1 | O1/O2v2 | - | yes | ybt 1; ICEKp10 |
| KP0401 | Respiratory secretion | KpI | CG23 | KL1 | O1/O2v2 | - | no | - |
| KP0411 | Respiratory secretion | KpI | CG23 | KL1 | O1/O2v2 | - | yes | ybt 1; ICEKp10 |
| KP0436 | Drainage & Puncture fluid | KpI | CG23 | KL1 | O1/O2v2 | - | yes | ybt 1; ICEKp10 |
| KP0445 | Respiratory secretion | KpI | CG23 | KL1 | O1/O2v2 | - | yes | ybt 1; ICEKp10 |
| KP0466 | Blood | KpI | CG23 | KL1 | O1/O2v2 | - | yes | ybt 1; ICEKp10 (truncated) |
| KP0394 | Abscess | KpI | CG23 | KL1 | O1/O2v2 | - | yes | ybt 1; ICEKp10 (truncated) |
| KP0430 | Respiratory secretion | KpI | CG23 | KL1 | O1/O2v2 | - | yes | ybt 1; ICEKp10 |
| KP0497 | Drainage & Puncture fluid | KpI | CG23 | KL1 | O1/O2v2 | - | yes | ybt 1; ICEKp10 |
| KP0461 | Digestive system secretion | KpI | CG23 | KL1 | O1/O2v2 | - | no | ybt 2; ICEKp1 |
| KP0400 | Drainage & Puncture fluid | KpI | CG23 | KL1 | O1/O2v2 | - | yes | ybt 1; ICEKp10 |
| KP0456 | Respiratory secretion | KpI | CG23 | KL1 | O1/O2v2 | - | yes | ybt 1; ICEKp10 |
| KP0521 | Drainage & Puncture fluid | KpI | CG23 | KL1 | O1/O2v2 | - | yes | ybt 1; ICEKp10 |
| KP0516 | Wound secretion | KpI | CG23 | KL1 | O1/O2v2 | - | yes | ybt 1; ICEKp10 |
| KP0519 | Respiratory secretion | KpI | CG23 | KL1 | O1/O2v2 | - | yes | ybt 1; ICEKp10 |
| KP0534 | Respiratory secretion | KpI | CG23 | KL1 | O1/O2v2 | - | yes | ybt 1; ICEKp10 (truncated) |
| KP0535 | Respiratory secretion | KpI | CG23 | KL1 | O1/O2v2 | - | yes | ybt 1; ICEKp10 |
| KP0555 | Respiratory secretion | KpI | CG23 | KL1 | O1/O2v2 | - | yes | ybt 1; ICEKp10 |
| KP0575 | Drainage & Puncture fluid | KpI | CG23 | KL1 | O1/O2v2 | - | yes | ybt 1; ICEKp10 |
| KP0628 | Respiratory secretion | KpI | CG23 | KL1 | O1/O2v2 | - | yes | ybt 1; ICEKp10 |
| KP0629 | Respiratory secretion | KpI | CG23 | KL1 | O1/O2v2 | - | yes | ybt 1; ICEKp10 |
| KP0650 | Others | KpI | CG23 | KL1 | O1/O2v2 | - | yes | ybt 1; ICEKp10 |
| KP0660 | Respiratory secretion | KpI | CG23 | KL1 | O1/O2v2 | - | yes | ybt 1; ICEKp10 |
| KP0777 | Respiratory secretion | KpI | CG23 | KL1 | O1/O2v2 | - | yes | ybt 1; ICEKp10 |
| KP0770 | Respiratory secretion | KpI | CG23 | KL1 | O1/O2v2 | - | yes | ybt 1; ICEKp10 |
| KP0744 | Respiratory secretion | KpI | CG23 | KL1 | O1/O2v2 | - | yes | ybt 1; ICEKp10 |
| KP0858 | Blood | KpI | CG23 | KL1 | O1/O2v2 | - | yes | ybt 1; ICEKp10 (truncated) |
| KP0788 | Respiratory secretion | KpI | CG23 | KL1 | O1/O2v2 | - | yes | ybt 1; ICEKp10 |
| KP0836 | Respiratory secretion | KpI | CG23 | KL1 | O1/O2v2 | - | yes | ybt 1; ICEKp10 |
| KP0820 | Respiratory secretion | KpI | CG23 | KL1 | O1/O2v2 | - | yes | ybt 1; ICEKp10 |
| KP0832 | Respiratory secretion | KpI | CG23 | KL1 | O1/O2v2 | - | yes | ybt 1; ICEKp10 |
| KP0881 | Respiratory secretion | KpI | CG23 | KL1 | O1/O2v2 | - | yes | ybt 1; ICEKp10 |
| KP0891 | Wound secretion | KpI | CG23 | KL1 | O1/O2v2 | - | yes | ybt 1; ICEKp10 |
| KP0885 | Drainage & Puncture fluid | KpI | CG23 | KL1 | O1/O2v2 | - | yes | ybt 1; ICEKp10 |
| KP0852 | Respiratory secretion | KpI | CG23 | KL1 | O1/O2v2 | - | yes | ybt 1; ICEKp10 |
| KP0849 | Respiratory secretion | KpI | CG23 | KL1 | O1/O2v2 | - | yes | ybt 1; ICEKp10 |
| KP0835 | Respiratory secretion | KpI | CG23 | KL1 | O1/O2v2 | - | yes | ybt 1; ICEKp10 |
| KP0949 | Blood | KpI | CG23 | KL1 | O1/O2v2 | - | yes | ybt 1; ICEKp10 |
| KP0935 | Respiratory secretion | KpI | CG23 | KL1 | O1/O2v2 | - | yes | ybt 1; ICEKp10 |
| KP0939 | Respiratory secretion | KpI | CG23 | KL1 | O1/O2v2 | - | yes | ybt 1; ICEKp10 |
| KP0916 | Urine | KpI | CG23 | KL1 | O1/O2v2 | - | yes | ybt 1; ICEKp10 |
| KP0937 | Drainage & Puncture fluid | KpI | CG23 | KL1 | O1/O2v2 | - | yes | ybt 1; ICEKp10 (truncated) |
| KP0964 | Respiratory secretion | KpI | CG23 | KL1 | O1/O2v2 | - | yes | ybt 1; ICEKp10 |
| KP0975 | Respiratory secretion | KpI | CG23 | KL1 | O1/O2v2 | - | yes | ybt 1; ICEKp10 |
| KP0985 | Respiratory secretion | KpI | CG23 | KL1 | O1/O2v2 | - | yes | ybt 1; ICEKp10 |
| KP0977 | Respiratory secretion | KpI | CG23 | KL1 | O1/O2v2 | - | yes | ybt 1; ICEKp10 |
| KP0965 | Urine | KpI | CG23 | KL1 | O1/O2v2 | - | yes | ybt 1; ICEKp10 |
| KP1009 | Respiratory secretion | KpI | CG23 | KL1 | O1/O2v2 | - | yes | ybt 1; ICEKp10 |
| KP1017 | Wound secretion | KpI | CG23 | KL1 | O1/O2v2 | - | yes | ybt 1; ICEKp10 |
| KP1015 | Drainage & Puncture fluid | KpI | CG23 | KL1 | O1/O2v2 | - | yes | ybt 1; ICEKp10 |
| KP0170 | Respiratory secretion | KpI | CG23 | KL1 | O1/O2v2 | - | no | ybt 2; ICEKp1 |
| KP0178 | Respiratory secretion | KpI | CG23 | KL1 | O1/O2v2 | - | yes | ybt 1; ICEKp10 (incomplete) |
| KP0174 | Respiratory secretion | KpI | CG23 | KL1 | O1/O2v2 | - | yes | ybt 1; ICEKp10 |
| KP0215 | Respiratory secretion | KpI | CG23 | KL1 | O1/O2v2 | - | yes | ybt 1; ICEKp10 |
| KP0196 | Blood | KpI | CG23 | KL1 | O1/O2v2 | - | yes | ybt 1; ICEKp10 |
| KP0199 | Drainage & Puncture fluid | KpI | CG23 | KL1 | O1/O2v2 | - | yes | ybt 1; ICEKp10 |
| KP0193 | Blood | KpI | CG23 | KL1 | O1/O2v2 | - | yes | ybt 1; ICEKp10 |
| KP0216 | Blood | KpI | CG23 | KL1 | O1/O2v2 | - | yes | ybt 1; ICEKp10 (truncated) |
| KP0205 | Respiratory secretion | KpI | CG23 | KL1 | O1/O2v2 | - | yes | ybt 1; ICEKp10 |
| KP0209 | Respiratory secretion | KpI | CG23 | KL1 | O1/O2v2 | - | yes | ybt 1; ICEKp10 |
| KP0227 | Blood | KpI | CG23 | KL1 | O1/O2v2 | - | yes | ybt 1; ICEKp10 |
| KP0262 | Urine | KpI | CG23 | KL1 | O1/O2v2 | - | yes | ybt 1; ICEKp10 |
| KP0263 | Drainage & Puncture fluid | KpI | CG23 | KL1 | O1/O2v2 | - | yes | ybt 1; ICEKp10 |
| KP0252 | Blood | KpI | CG23 | KL1 | O1/O2v2 | - | yes | ybt 1; ICEKp10 |
| KP0256 | Respiratory secretion | KpI | CG23 | KL1 | O1/O2v2 | - | yes | ybt 1; ICEKp10 |
| KP0280 | Blood | KpI | CG23 | KL1 | O1/O2v2 | - | yes | ybt 1; ICEKp10 |
| KP0349 | Respiratory secretion | KpI | CG23 | KL1 | O1/O2v2 | - | yes | ybt 1; ICEKp10 |
| KP0380 | Respiratory secretion | KpI | CG23 | KL1 | O1/O2v2 | - | yes | ybt 1; ICEKp10 |
| KP0339 | Drainage & Puncture fluid | KpI | CG23 | KL1 | O1/O2v2 | - | yes | ybt 1; ICEKp10 |
| KP0325 | CSF | KpI | CG23 | KL1 | O1/O2v2 | - | yes | ybt 1; ICEKp10 |
| KP0323 | Respiratory secretion | KpI | CG23 | KL1 | O1/O2v2 | - | yes | ybt 1; ICEKp10 |
| KP0331 | Respiratory secretion | KpI | CG23 | KL1 | O1/O2v2 | - | yes | ybt 1; ICEKp10 |
| KP0335 | Respiratory secretion | KpI | CG23 | KL1 | O1/O2v2 | - | yes | ybt 1; ICEKp10 |
| KP0314 | Respiratory secretion | KpI | CG23 | KL1 | O1/O2v2 | - | yes | ybt 1; ICEKp10 |
| KP0159 | Respiratory secretion | KpI | CG23 | KL1 | O1/O2v2 | - | yes | ybt 1; ICEKp10 (truncated) |
| KP0027 | Drainage & Puncture fluid | KpI | CG23 | KL1 | O1/O2v2 | - | yes | ybt 1; ICEKp10 |
| KP0019 | Respiratory secretion | KpI | CG23 | KL1 | O1/O2v2 | - | yes | ybt 1; ICEKp10 |
| KP0141 | Drainage & Puncture fluid | KpI | CG23 | KL1 | O1/O2v2 | - | yes | ybt 1; ICEKp10 |
| KP0004 | Blood | KpI | CG23 | KL1 | O1/O2v2 | - | yes | ybt 1; ICEKp10 |
| KP0014 | Respiratory secretion | KpI | CG23 | KL1 | O1/O2v2 | - | yes | ybt 1; ICEKp10 |
| KP0020 | Respiratory secretion | KpI | CG23 | KL1 | O1/O2v2 | - | yes | ybt 1; ICEKp10 |
| KP0050 | Respiratory secretion | KpI | CG23 | KL1 | O1/O2v2 | - | yes | ybt 1; ICEKp10 |
| KP0045 | Respiratory secretion | KpI | CG23 | KL1 | O1/O2v2 | - | yes | ybt 1; ICEKp10 |
| KP0067 | Respiratory secretion | KpI | CG23 | KL1 | O1/O2v2 | - | yes | ybt 1; ICEKp10 |
| KP0055 | Drainage & Puncture fluid | KpI | CG23 | KL1 | O1/O2v2 | - | yes | ybt 1; ICEKp10 |
| KP0086 | Drainage & Puncture fluid | KpI | CG23 | KL1 | O1/O2v2 | - | yes | ybt 1; ICEKp10 |
| KP0084 | Respiratory secretion | KpI | CG23 | KL1 | O1/O2v2 | - | yes | ybt 1; ICEKp10 |
| KP0102 | Blood | KpI | CG23 | KL1 | O1/O2v2 | - | yes | ybt 1; ICEKp10 |
| KP0037 | Respiratory secretion | KpI | CG23 | KL1 | O1/O2v2 | - | yes | ybt 1; ICEKp10 (truncated) |
| KP0039 | Drainage & Puncture fluid | KpI | CG23 | KL1 | O1/O2v2 | - | yes | ybt 1; ICEKp10 |
| KP0121 | Others | KpI | CG23 | KL1 | O1/O2v2 | - | yes | ybt 1; ICEKp10 |
| KP2541 | Respiratory secretion | KpI | CG23 | KL1 | O1/O2v2 | - | yes | ybt 1; ICEKp10 |
| KP2550 | Abscess | KpI | CG23 | KL1 | O1/O2v2 | - | yes | ybt 1; ICEKp10 |
| KP2570 | Respiratory secretion | KpI | CG23 | KL1 | O1/O2v2 | - | yes | ybt 1; ICEKp10 |
| KP2572 | Respiratory secretion | KpI | CG23 | KL1 | O1/O2v2 | - | yes | ybt 1; ICEKp10 |
| KP2616 | Drainage & Puncture fluid | KpI | CG23 | KL1 | O1/O2v2 | - | yes | ybt 1; ICEKp10 |
| KP2628 | Respiratory secretion | KpI | CG23 | KL1 | O1/O2v2 | - | yes | ybt 1; ICEKp10 (truncated) |
| KP2671 | Blood | KpI | CG23 | KL1 | O1/O2v2 | - | no | - |
| KP2685 | Respiratory secretion | KpI | CG23 | KL1 | O1/O2v2 | - | yes | ybt 1; ICEKp10 |
| KP2689 | Blood | KpI | CG23 | KL1 | O1/O2v2 | - | yes | ybt 1; ICEKp10 |
| KP2702 | Blood | KpI | CG23 | KL1 | O1/O2v2 | - | yes | ybt 1; ICEKp10 |
| KP2728 | Abscess | KpI | CG23 | KL1 | O1/O2v2 | - | yes | ybt 1; ICEKp10 |
| KP2739 | Urine | KpI | CG23 | KL1 | O1/O2v2 | - | yes | ybt 1; ICEKp10 |
| KP2757 | Abscess | KpI | CG23 | KL1 | O1/O2v2 | - | yes | ybt 1; ICEKp10 |
| KP2771 | Respiratory secretion | KpI | CG23 | KL1 | O1/O2v2 | - | yes | ybt 1; ICEKp10 |
| KP2783 | Respiratory secretion | KpI | CG23 | KL1 | O1/O2v2 | - | yes | ybt 1; ICEKp10 |
| KP2798 | Respiratory secretion | KpI | CG23 | KL1 | O1/O2v2 | - | yes | ybt 1; ICEKp10 |
| KP2824 | Respiratory secretion | KpI | CG23 | KL1 | O1/O2v2 | - | yes | ybt 1; ICEKp10 |
| KP2827 | Drainage & Puncture fluid | KpI | CG23 | KL1 | O1/O2v2 | - | yes | ybt 1; ICEKp10 |

**Supplementary figure 1** *SNP* matrix plot of 184 ST23 *Klebsiella pneumoniae* isolates.


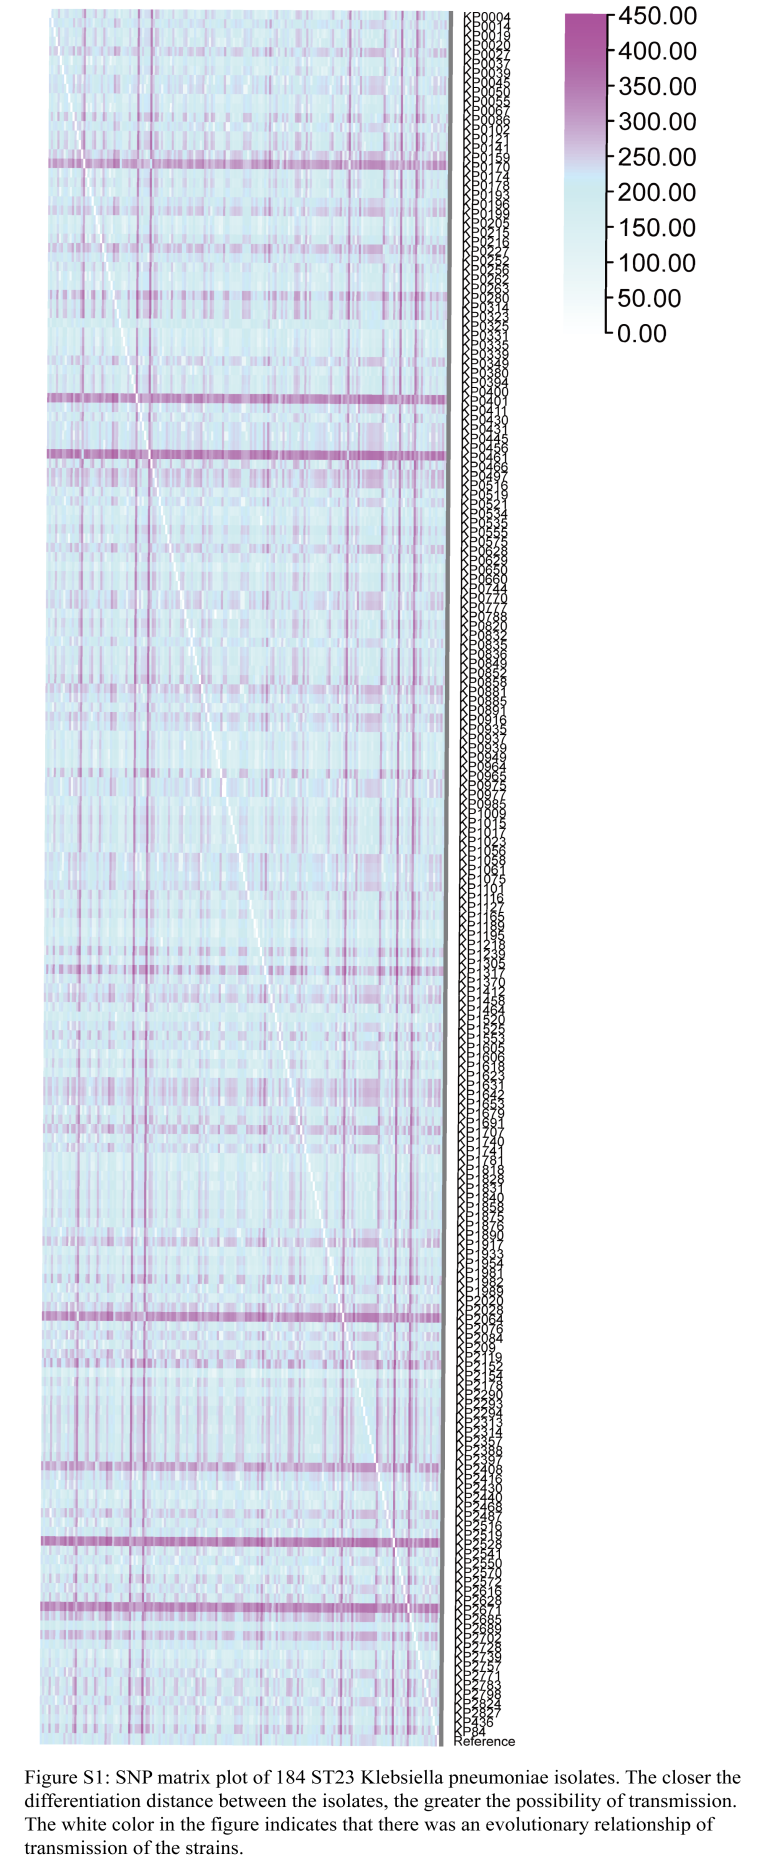

Supplement: Supplementary file 1 [file get_supplementary_file.php]
